# Supplementary material
Source: PubMed Central journal article supplement (PMC3767507)
Supplement: 1311341110_pnas.201311341SI.pdf [file 1311341110_pnas.201311341SI.pdf]

# Supporting Information

Remnant et al. 10.1073/pnas.1311341110

## SI Text

### Frequency of the Duplication in the DGRP and Australian Populations

The *Drosophila* Genomic Reference Panel (DGRP) dataset of 168 sequenced lines contained three strains with the 113-kb duplication surrounding *Resistance to Dieldrin* (*Rdl*; Ral-317, Ral-318, and Ral-378). Subsequent to the release of this public resource, Ral-378 has been removed from the list of available lines and was not included in genome-wide analysis studies (1). Estimates of Ser<sup>301</sup> frequency in the DGRP were

based on 4 lines (Ral-317, -318, -378, and -491) of 168 lines (2.4%).

Our Australian survey consisted of 20 males collected at 19 locations ranging from Cooktown to Tasmania along the Australian East coast. Duplication primers were tested without yielding positive products. However, the *nwk-Roo* product was amplified from 9 of the 19 populations, indicating its presence in intron 7 of *nwk* in some individuals in that pool. There was a strong correlation between the presence of *nwk-Roo* and the Ser<sup>301</sup> mutation, which was present in 3% of the populations tested. No populations showed amplification of the *glutamate receptor 1B* (*Glu-R1B*) product.

1. Mackay TFC, et al. (2012) The *Drosophila melanogaster* genetic reference panel. *Nature* 482(7384):173–178.

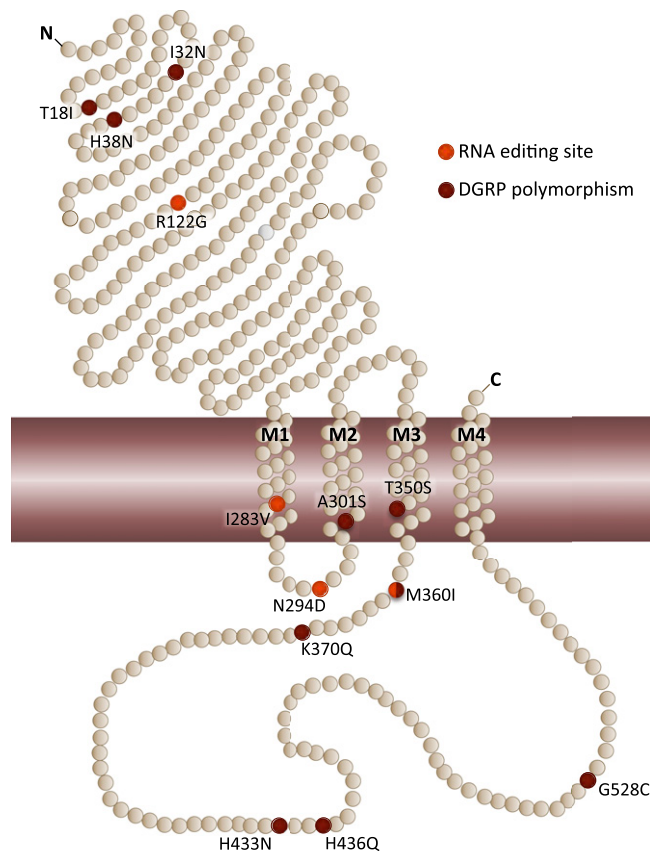

**Fig. S1.** Schematic representation of the RDL subunit monomer. Each subunit consists of a large, extracellular N-terminal ligand-binding region, followed by four transmembrane domains. Subunits pentamerize to form a chloride channel, which is lined by the second transmembrane domain. Localization of non-synonymous polymorphisms identified in the DGRP genome sequences and RNA editing sites are indicated (adapted from ref. 1).

1. Wotring VE, Miller TS, Weiss DS (2003) Mutations at the GABA receptor selectivity filter: A possible role for effective charges. *J Physiol* 548(Pt 2):527–540.

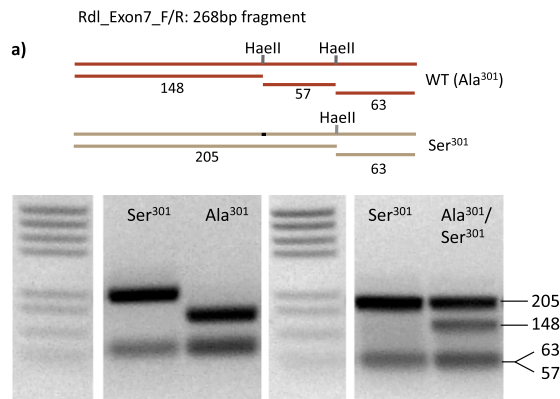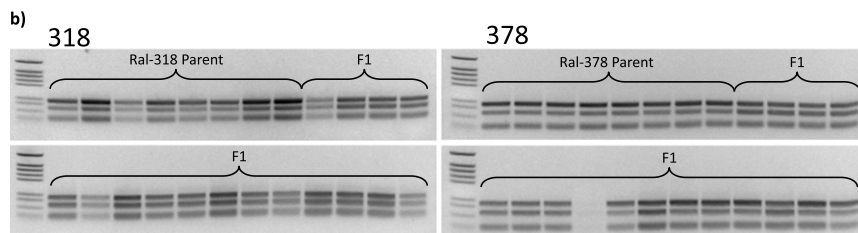

**Fig. S2.** Haell diagnostic restriction digest assay to detect Ala<sup>301</sup> and Ser<sup>301</sup> alleles in *Rdl* exon 7. (A) Of the 268-bp PCR fragment, Haell digest yields three bands for WT Ala<sup>301</sup> alleles (148, 63, and 57 bp). Ser<sup>301</sup> removes a Haell restriction site yielding two bands (205 and 63 bp). (B) Testing of Ral-318 and Ral-378 parents and F<sub>1</sub> offspring from a cross to WT *w<sup>1118</sup>* lines. *w<sup>1118</sup>* exhibit the WT Ala<sup>301</sup> banding pattern as seen in A. Male and female parents used in reciprocal crosses to *w<sup>1118</sup>* are indicated and show all four bands (205, 148, 63, and 57 bp), indicating heterozygous genotype. F<sub>1</sub> offspring retain the same banding pattern, showing that the Ser<sup>301</sup> allele is inherited from the Ral- parents 100% of the time, supporting the duplication hypothesis.

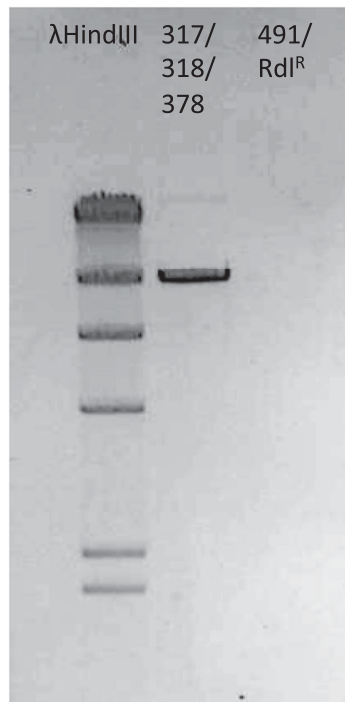

**Fig. S3.** PCR product obtained from DGRP Ral-317 spanning the *Roo* transposable element (TE) using the primers *Glu\_int1\_F* and *nwk\_int7\_R*. The same product was present in Ral-318 and -378 but was not present in Ral-491 or *Rdl<sup>R</sup>-MDRR*.



**Table S3. Primers used to confirm putative duplication topology, exon 7 *Hae*III digest, exon 7–8 sequencing, and cloning of *Rdl* left and right arms for recombineering**

| Name                  | Sequence (5'-3')               | Location                                                                         |
|-----------------------|--------------------------------|----------------------------------------------------------------------------------|
| <i>Glu_int1_F</i>     | TTGCTTTGGTCAATGTTTGC           | Intron 1 of <i>Glu-RIB</i> , upstream of <i>Roo</i> insertion                    |
| <i>Glu_int1_R</i>     | TCGTTCTCGTTAGTTCGACAGA         | Intron 1 of <i>Glu-RIB</i> , downstream of <i>Roo</i> insertion                  |
| <i>Roo_LTR_F</i>      | GAACGGAGCCAAAATTGTA            | 3' end of <i>Roo</i> element LTR                                                 |
| <i>Roo_LTR_R</i>      | CTCTGCGTAGGCCATTAC             | 5' end of <i>Roo</i> element LTR                                                 |
| <i>nwk_ex7_F</i>      | GAGTATTCCTCCGCCAGGTA           | Exon 7 of <i>nwk</i> , upstream of <i>Roo</i> insertion                          |
| <i>nwk_int7_R</i>     | AATCGTAGGGCATTTCATCG           | Intron 7 of <i>nwk</i> , downstream of <i>Roo</i> insertion                      |
| <i>Rdl_LA-AscI_F</i>  | GGCGCGCCGTCTAAACAGCGACACC      | 5' of the <i>Rdl</i> locus, to generate the left arm for P[acman] recombineering |
| <i>Rdl_LA-BamHI_R</i> | CCAAGAAAATAGTTAGGATCCGAGGAGACG |                                                                                  |
| <i>Rdl_RA-BamHI_F</i> | CAGGATCCCACGTTACGCATACGCCGTG   | 3' of the <i>Rdl</i> locus, to generate the left arm for P[acman] recombineering |
| <i>Rdl_RA-PacI_R</i>  | TTAATTAACAGCTGCACATGCCACG      |                                                                                  |
| <i>Rdl_Ex7_F</i>      | CAACTATTCGCGTTTTCAGCTCGC       | Exon 7 of <i>Rdl</i> ; used for <i>Hae</i> III digests and sequencing            |
| <i>Rdl_Ex7_R</i>      | GACCATAACGAAGCATGTTCCC         | Exon 7 of <i>Rdl</i> ; used for <i>Hae</i> III digests                           |
| <i>Rdl_Ex8_R</i>      | CACCGTATTCTCCAGCGTTCC          | Exon 8 of <i>Rdl</i> ; used for sequencing                                       |

**Table S4. Frequency of WT and mutant *Rdl* cDNA**

| Genotype                                      | No. of clones | Frequency |
|-----------------------------------------------|---------------|-----------|
| WT: Ala <sup>301</sup> Met <sup>360</sup>     | 21            | 0.47      |
| Mutant: Ser <sup>301</sup> Ile <sup>360</sup> | 24            | 0.53      |

Frequency of changes identified in individual clones obtained by sequencing the *Rdl* exon 7–8 PCR product of cDNA generated from adult heads from DGRP lines Ral-318 and Ral-378.

**Table S5. Frequency of RNA editing in WT and mutant *Rdl* cDNA**

| Change  | No. of clones |       |           | Frequency |       |           |
|---------|---------------|-------|-----------|-----------|-------|-----------|
|         | Total         | In WT | In mutant | Total     | In WT | In mutant |
| I283V   | 37            | 17    | 20        | 0.82      | 0.81  | 0.83      |
| N294D   | 13            | 12    | 1         | 0.28      | 0.57* | 0.04*     |
| M/I360V | 7             | 1     | 6         | 0.15      | 0.05  | 0.25      |

Frequency of changes identified in individual clones obtained by sequencing the *Rdl* exon 7–8 PCR product of cDNA generated from adult heads from DGRP lines Ral-318 and Ral-378.

\*Significant difference in RNA editing frequency between WT and mutant (Fisher exact test,  $P = 0.00013$ ).

**Table S6. LC50 values for dieldrin (lethal concentration for 50% of the population) with 95% CIs and fold resistance with 95% CIs observed in natural populations and transgenic lines with *Rdl* duplication and resistance mutations**

| Line                                            | Genotype                                                              | LC50 ( $\mu\text{g}/\mu\text{L}$ ) (95% CI) | Fold (95% CI)          |
|-------------------------------------------------|-----------------------------------------------------------------------|---------------------------------------------|------------------------|
| Ral-882                                         | $\frac{Rdl^{WT}}{Rdl^{WT}}$                                           | 0.3 (0.25–0.33)                             | 1 (0.84–1.19)          |
| Ral-378                                         | $\frac{Rdl^{WT} / Rdl^{S301}}{Rdl^{WT} / Rdl^{S301}}$                 | 8.2 (7.9–8.6)                               | 27.8 (24.4–31.7)       |
| <i>Rdl<sup>R</sup></i> MD-RR                    | $\frac{Rdl^{S301}}{Rdl^{S301}}$                                       | 13,750 (12,550–14,600)                      | 45,800 (40,430–53,360) |
| $\Phi$ -86Fb-empty                              | $\frac{P[acman]^{empty} ; Rdl^{WT}}{P[acman]^{empty} Rdl^{WT}}$       | 0.22 (0.19–0.24)                            | 1 (0.87–1.15)          |
| $\Phi$ -86Fb-P[ac]- <i>Rdl</i> <sup>WT</sup>    | $\frac{P[acman]-Rdl^{WT} ; Rdl^{WT}}{P[acman]-Rdl^{WT} Rdl^{WT}}$     | 0.23 (0.21–0.25)                            | 1 (0.93–1.22)          |
| $\Phi$ -86Fb-P[ac]- <i>Rdl</i> <sup>A301S</sup> | $\frac{P[acman]-Rdl^{S301} ; Rdl^{WT}}{P[acman]-Rdl^{S301} Rdl^{WT}}$ | 1.3 (1.2–1.4)                               | 6 (5.2–6.6)            |
